# Supplementary material for: Cells Responding to Closely Related Cholesterol-Dependent Cytolysins Release Extracellular Vesicles with a Common Proteomic Content Including Membrane Repair Proteins
Source: MDPI journal article supplement (doi:10.3390/toxins15010004), 2022-12-20
Supplement: s1 [file s1]

**Table S6.** Sequence of the oligonucleotides designed as gRNA for CRISPR/Cas-9 gene editing and used for the cloning of CPNE1 and CPNE3 into pEGFP-C1.

|                                            |         |                                                   |
|--------------------------------------------|---------|---------------------------------------------------|
| <b>CPNE1 exon 4<br/>(gRNA)</b>             | Forward | 5' CAC CGT TGG CCG GAC TGA ACG GGT G 3'           |
|                                            | Reverse | 5' AAA CCA CCC GTT CAG TCC GGC CAA 3'             |
| <b>CPNE1 exon 10<br/>(gRNA)</b>            | Forward | 5' CAC CGT TTT CTG CTG CTT CTC AGG G 3'           |
|                                            | Reverse | 5' AAA CCC CTG AGA AGC AGC AGA AAA C 3'           |
| <b>CPNE3 exon 4<br/>(gRNA)</b>             | Forward | 5' CAC CGA GTG ATG ATG ACT TCT TAG 3'             |
|                                            | Reverse | 5' AAA CCT AAG AAG TCA TCA TCA CTC 3'             |
| <b>CPNE3 exon 13<br/>(gRNA)</b>            | Forward | 5' CAC CGC GCT CAG ATA CCT CCT CAG 3'             |
|                                            | Reverse | 5' AAA CCT GAG GAG GTA TCT GAG CGC 3'             |
| <b>GFP-CPNE1<br/>(cloning in pEGFP-C1)</b> | Forward | 5' ATT CTC GAG ACG CCC ACT GCG TGA CCT TGG 3'     |
|                                            | Reverse | 5' ATT GTC GAC CTA GGC CTG GGG GGC CTG TG 3'      |
| <b>GFP-CPNE3<br/>(cloning in pEGFP-C1)</b> | Forward | 5' ATA CTC GAG CAG CTG CCC AGT GTG TCA C 3'       |
|                                            | Reverse | 5' TCC GGA TCC TCA CTG CTT CTG TTG TTT CGT GGC 3' |
