# Supplementary figures and images for: Cells Responding to Closely Related Cholesterol-Dependent Cytolysins Release Extracellular Vesicles with a Common Proteomic Content Including Membrane Repair Proteins
Source: MDPI journal article supplement (doi:10.3390/toxins15010004), 2022-12-20

Related to figure 4D

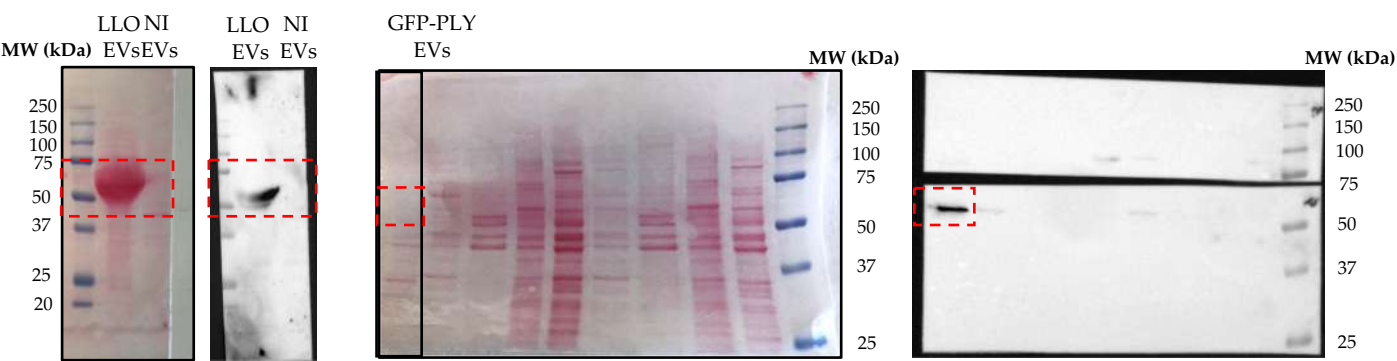

Related to supplementary figure S3

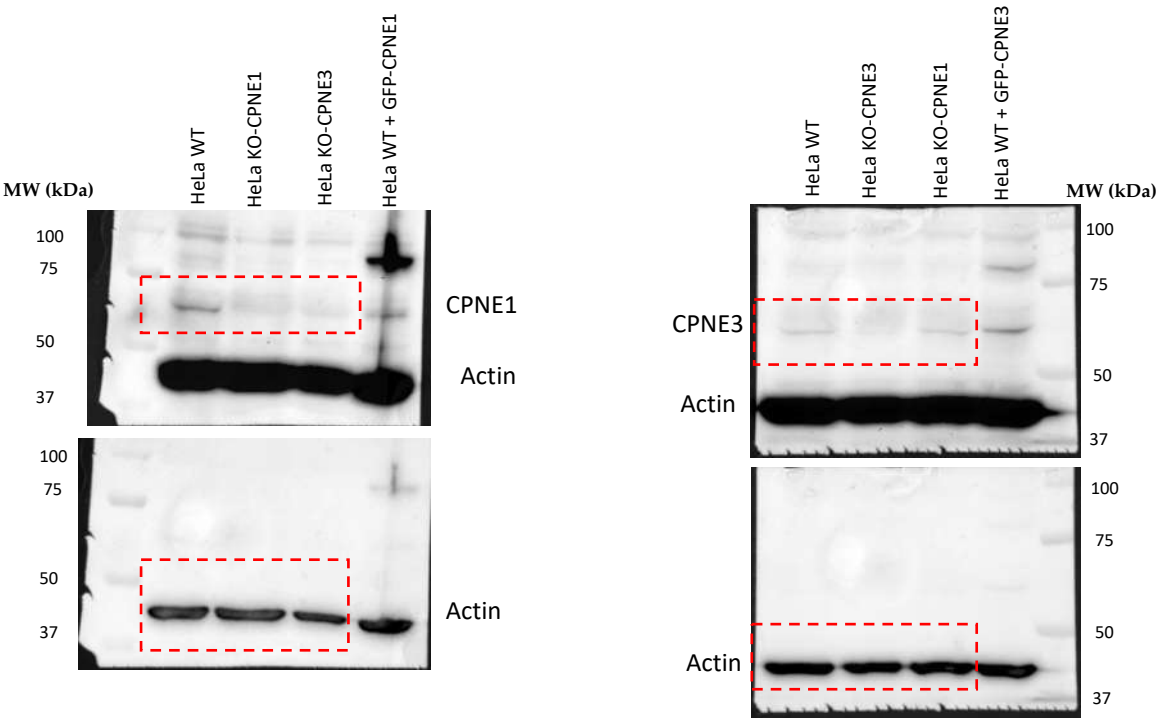

Supplement: s1 [file s1]
